# Supplementary material for: Hierarchical porous Co-rich PtCo thin films for alkaline seawater hydrogen evolution with chlorine corrosion resistance
Source: Royal Society of Chemistry journal article supplement (doi:10.1039/d4ta08678c), 2025-01-01
Supplement: d4ta08678c1.pdf [file d4ta08678c1.pdf]

1 **Supplementary Materials**

2 **Hierarchical porous Co-rich PtCo thin films for alkaline seawater**  
3 **hydrogen evolution with chlorine corrosion resistance**

4 **Meilin Zhang<sup>1</sup>, Hanzhong Cui<sup>2,3</sup>, Zhou Yang<sup>2,3</sup>, Jie Yan<sup>2,3</sup>, Jin Zhang<sup>2,3\*</sup>, Huan**  
5 **Ma<sup>2,3</sup>, Renguo Guan<sup>2,3\*\*</sup>**

6 <sup>1</sup> *School of Materials Science and Engineering, Northeastern University, Shenyang*  
7 *110819, China;*

8 <sup>2</sup> *Key Laboratory of Near-Net Forming of Light Metals of Liaoning Province, Dalian*  
9 *Jiaotong University, Dalian 116028, China*

10 <sup>3</sup> *Engineering Research Center of Continuous Extrusion, Ministry of Education, Dalian*  
11 *Jiaotong University, Dalian 116028, China;*

12 \* *Correspondence: jinzhang@djtu.edu.cn (J.Z.)*

13 \*\* *Co-Correspondence: guanrenguo@sina.cn (R.G.)*

## 14 Preparation of Pt/C electrode

15 100  $\mu\text{L}$  Nafion solution (5 wt.%) was diluted with 3 mL isopropanol. The 9 mg  
16 commercial 20 wt.% Pt/C was uniformly dispersed into the diluted Nafion solution by  
17 ultrasonic treatment. Subsequently, 15  $\mu\text{L}$  of the mixed solution was dropped onto the  
18 surface of the pre-polished glassy carbon electrode (GCE, diameter: 5 mm). After  
19 natural drying at room temperature, it is used as a working electrode for HER test.

## 20 Tafel slope and HER mechanism

21 The Tafel slopes of catalysts were calculated from the LSV curves, according to  
22 formula (S1) [S1, S2]:

$$23 \quad \eta = a + b \lg j \quad (\text{S1})$$

24 where  $\eta$  is overpotential (V vs. RHE),  $a$  is the y-axis intercept,  $b$  is Tafel slope  
25 ( $\text{mV sec}^{-1}$ ), and  $j$  is current density ( $\text{mA cm}^{-2}$ ).

26 The HER mechanism can be interrogated from the Tafel slopes. In alkaline  
27 environment, the electrolysis of water includes the following cathodic hydrogen  
28 evolution reaction and anodic oxygen evolution reaction [S3]:

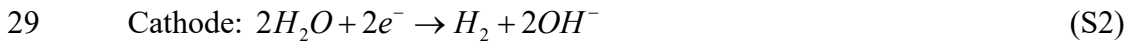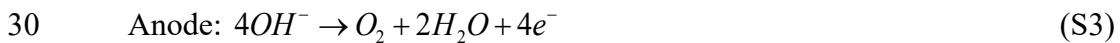

31 The cathodic hydrogen evolution reaction usually includes two steps. The first step  
32 is called the Volmer step ( $120 \text{ mV sec}^{-1}$ ), in which electrons on the cathode surface  
33 attract  $\text{H}_2\text{O}$  molecules from the electrolyte to produce adsorbed H atoms ( $\text{H}^*$ ) as  
34 reaction intermediates [S4]:

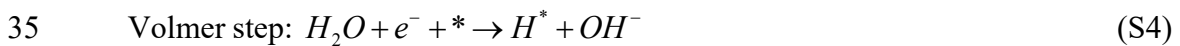

36 The second step involves the formation of  $\text{H}_2$  molecules. The coverage of  $\text{H}^*$  on  
37 the cathode surface determines two different pathways [S4]:

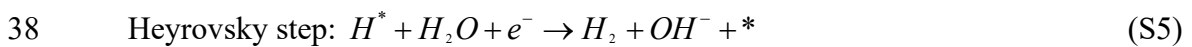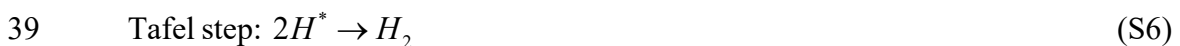

40 where \* refers to an active site. When the coverage of H\* on the cathode surface  
41 is low, H\* is easy to combine with additional electrons and a new H<sub>2</sub>O molecule to  
42 form H<sub>2</sub> molecules, which is called the Heyrovsky step (40 mV sec<sup>-1</sup>). On the contrary,  
43 the high H\* coverage makes the second step occur as a Tafel step (30 mV sec<sup>-1</sup>), in  
44 which two adjacent H\* bind to form H<sub>2</sub> molecules. Tafel step is a chemical desorption  
45 process.

#### 46 **Electrochemical active area (ECSA) and roughness factor (RF)**

47 The charging current  $\Delta I$  (mA) of catalysts at open circuit potential is calculated  
48 according to formula (S7) [S5]:

$$49 \quad \Delta I = |I_{cathode} - I_{anode}|_{ocp} \quad (S7)$$

50 where  $I_{cathode}$  and  $I_{anode}$  are cathode current (mA) and anode current (mA) at open  
51 circuit potential, respectively.

52 The double-layer capacitance values  $C_{dl}$  (mF) are determined based on formula  
53 (S8) [S5]:

$$54 \quad C_{dl} = \frac{\Delta I}{2\Delta v} \times 1000 \quad (S8)$$

55 where  $\Delta v$  is the scan rate in the CV test (mV s<sup>-1</sup>).

56 The ECSA (cm<sup>2</sup>) of the catalysts is estimated using formula (S9) [S5]:

$$57 \quad ECSA = \frac{C_{dl}}{C_s} \quad (S9)$$

58 Where  $C_s$  represents the specific capacitance in alkaline media, the value of which  
59 is 0.04 mF cm<sup>-2</sup>.

60 The RF of the catalysts can be further calculated through formula (S10) [S5]:

$$61 \quad RF = \frac{ECSA}{S} \quad (S10)$$

62 where  $S$  is the geometric area of the catalysts with a value of 0.25 cm<sup>-2</sup>.

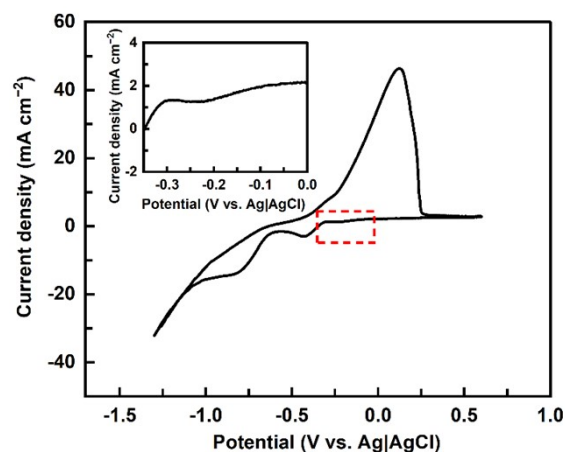

63

64

65 Fig. S1. CV of the electrolyte on a vitreous carbon electrode under stagnant

66

conditions. Electrolyte contains 2 mM  $\text{Na}_2\text{PtCl}_6$ , 200 mM  $\text{CoCl}_2$ , 0.1 M  $\text{NH}_4\text{Cl}$ , 0.2 M  $\text{H}_3\text{BO}_3$ , and 40 g  $\text{L}^{-1}$  F127.

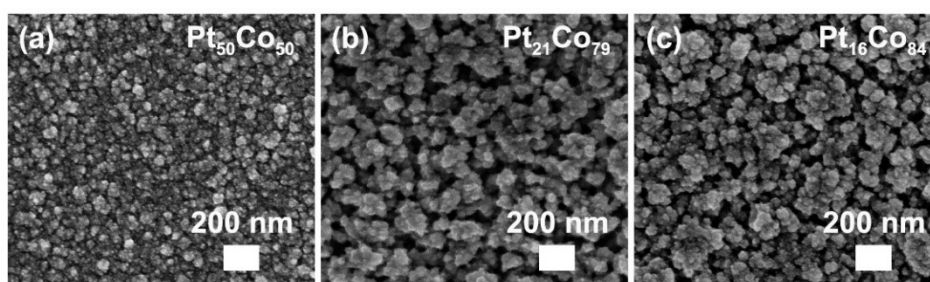

67

68

Fig. S2. Magnified SEM image of (a)  $\text{Pt}_{50}\text{Co}_{50}$ , (b)  $\text{Pt}_{21}\text{Co}_{79}$ , and (c)  $\text{Pt}_{16}\text{Co}_{84}$ .

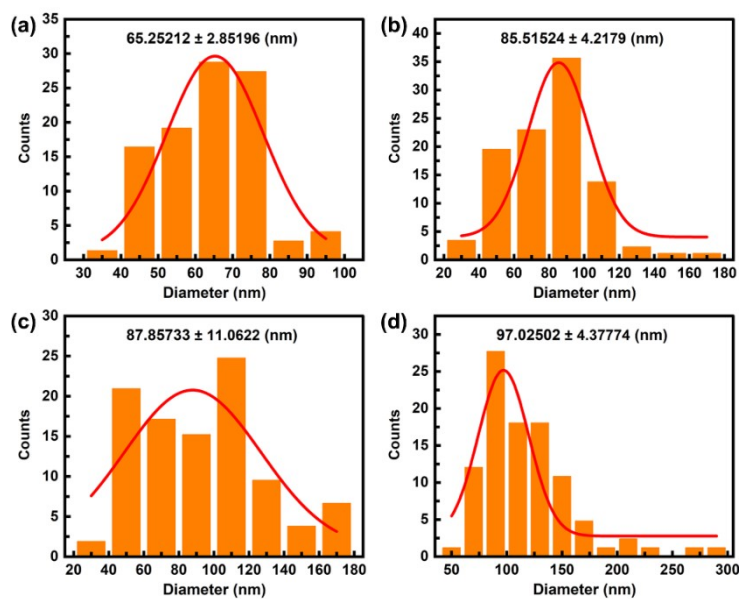

69

70

71

Fig. S3. The particle size distribution statistics of (a)  $\text{Pt}_{50}\text{Co}_{50}$ , (b)  $\text{Pt}_{34}\text{Co}_{66}$ , (c)  $\text{Pt}_{21}\text{Co}_{79}$ , and (d)  $\text{Pt}_{16}\text{Co}_{84}$  depicted in Fig. 1f and Fig. S2.

| Sample                            | Binding energy (eV)  |                      |                      |                      |
|-----------------------------------|----------------------|----------------------|----------------------|----------------------|
|                                   | Pt 4f <sub>7/2</sub> | Pt 4f <sub>5/2</sub> | Co 2p <sub>3/2</sub> | Co 2p <sub>1/2</sub> |
| Pt <sub>50</sub> Co <sub>50</sub> | 71.58                | 74.88                | 780.78               | 796.68               |
| Pt <sub>34</sub> Co <sub>66</sub> | 71.48                | 74.88                | 780.38               | 797.48               |
| Pt <sub>21</sub> Co <sub>79</sub> | 71.58                | 74.88                | 780.88               | 796.78               |
| Pt <sub>16</sub> Co <sub>84</sub> | 71.48                | 74.78                | 780.68               | 796.38               |

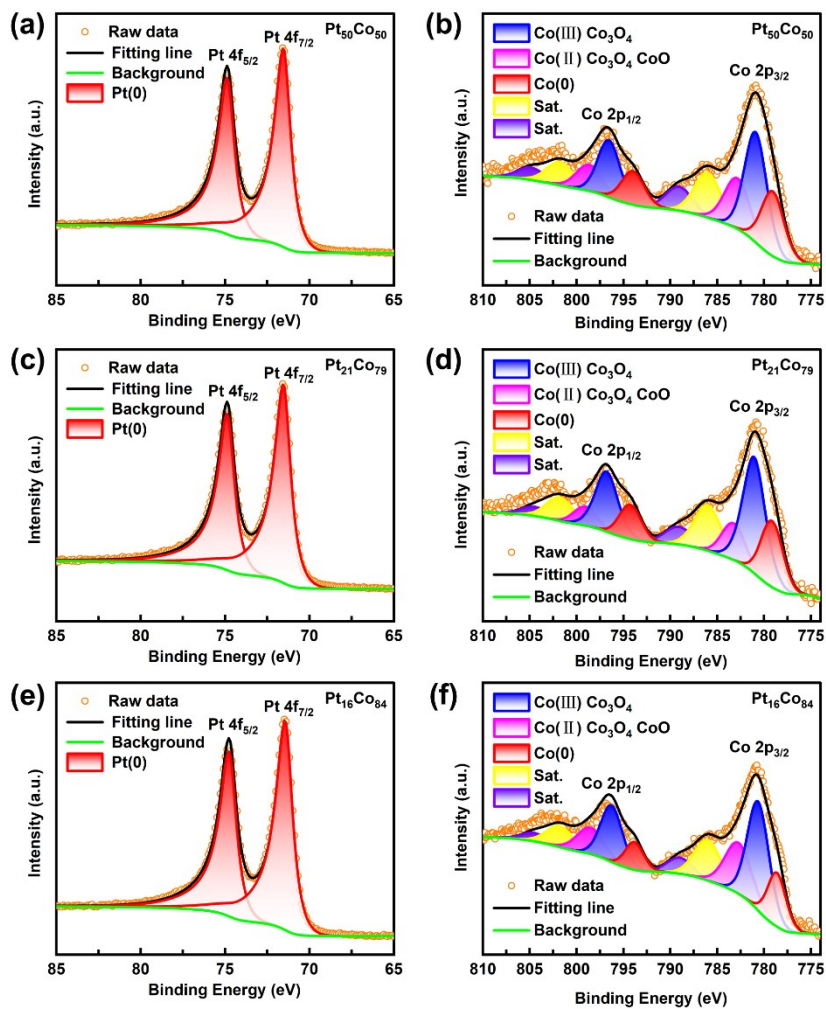

73

74

Fig. S4. High resolution XPS spectra of as-deposited (a, b) Pt<sub>50</sub>Co<sub>50</sub>, (c, d)

75

Pt<sub>21</sub>Co<sub>79</sub>, and (e, f) Pt<sub>16</sub>Co<sub>84</sub> films.

76 Table S2. The separate fitting results of the XPS peaks of as-deposited PtCo films in  
 77 Fig. S4, Fig. 8a, and Fig. 8b.

| Peaks                           | Binding energy (eV)               |                                   |                                   |                                   |
|---------------------------------|-----------------------------------|-----------------------------------|-----------------------------------|-----------------------------------|
|                                 | Pt <sub>50</sub> Co <sub>50</sub> | Pt <sub>34</sub> Co <sub>66</sub> | Pt <sub>21</sub> Co <sub>79</sub> | Pt <sub>16</sub> Co <sub>84</sub> |
| Pt 4f <sub>7/2</sub>            | 71.58                             | 71.48                             | 71.58                             | 71.48                             |
| Pt 4f <sub>5/2</sub>            | 74.88                             | 74.88                             | 74.88                             | 74.78                             |
| Co (0) 2p <sub>3/2</sub>        | 779.18                            | 778.28                            | 779.28                            | 778.78                            |
| Co (0) 2p <sub>1/2</sub>        | 794.08                            | 792.98                            | 794.38                            | 793.88                            |
| Co (III) 2p <sub>3/2</sub>      | 780.98                            | 779.98                            | 781.18                            | 780.78                            |
| Co (III) 2p <sub>1/2</sub>      | 796.68                            | 795.28                            | 796.88                            | 796.38                            |
| Co (II) 2p <sub>3/2</sub>       | 783.08                            | 781.18                            | 783.38                            | 782.98                            |
| Co (II) 2p <sub>1/2</sub>       | 798.78                            | 797.88                            | 799.18                            | 798.68                            |
| Co (III) 2p <sub>3/2</sub> Sat. | 786.08                            | 786.08                            | 786.08                            | 786.18                            |
| Co (III) 2p <sub>1/2</sub> Sat. | 801.98                            | 801.88                            | 801.98                            | 801.88                            |
| Co (II) 2p <sub>3/2</sub> Sat.  | 789.18                            | 789.78                            | 789.18                            | 789.08                            |
| Co (II) 2p <sub>1/2</sub> Sat.  | 805.08                            | 805.08                            | 804.78                            | 804.78                            |

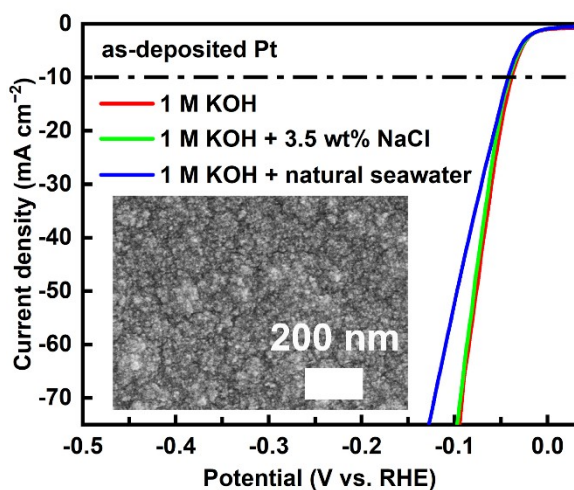

78  
 79

Fig. S5. LSV curves of as-deposited Pt films (the insert is SEM image).

80 Table S3. The HER performance of Pt<sub>50</sub>Co<sub>50</sub>, Pt<sub>34</sub>Co<sub>66</sub>, Pt<sub>21</sub>Co<sub>79</sub>, Pt<sub>16</sub>Co<sub>84</sub>, commercial  
 81 Pt/C, and Pt in different electrolytes.

| Electrolytes                    | Catalysts                         | Overpotential (mV vs. RHE) |                     |                     | Tafel<br>slope (mV<br>dec <sup>-1</sup> ) |
|---------------------------------|-----------------------------------|----------------------------|---------------------|---------------------|-------------------------------------------|
|                                 |                                   | @-10                       | @-50                | @-70                |                                           |
|                                 |                                   | mA cm <sup>-2</sup>        | mA cm <sup>-2</sup> | mA cm <sup>-2</sup> |                                           |
| 1M KOH                          | Pt <sub>50</sub> Co <sub>50</sub> | 39                         | 80                  | 95                  | 28                                        |
|                                 | Pt <sub>34</sub> Co <sub>66</sub> | 35                         | 63                  | 75                  | 24                                        |
|                                 | Pt <sub>21</sub> Co <sub>79</sub> | 48                         | 110                 | 132                 | 37                                        |
|                                 | Pt <sub>16</sub> Co <sub>84</sub> | 55                         | 124                 | 147                 | 49                                        |
|                                 | Pt/C                              | 41                         | 123                 | 159                 | 35                                        |
|                                 | Pt                                | 39                         | 77                  | 92                  | -                                         |
| 1M KOH +<br>3.5 wt% NaCl        | Pt <sub>50</sub> Co <sub>50</sub> | 40                         | 73                  | 84                  | 25                                        |
|                                 | Pt <sub>34</sub> Co <sub>66</sub> | 33                         | 63                  | 76                  | 22                                        |
|                                 | Pt <sub>21</sub> Co <sub>79</sub> | 46                         | 86                  | 99                  | 31                                        |
|                                 | Pt <sub>16</sub> Co <sub>84</sub> | 45                         | 111                 | 133                 | 36                                        |
|                                 | Pt/C                              | 51                         | 184                 | 242                 | 44                                        |
|                                 | Pt                                | 41                         | 79                  | 94                  | -                                         |
| 1M KOH +<br>natural<br>seawater | Pt <sub>50</sub> Co <sub>50</sub> | 35                         | 71                  | 83                  | 39                                        |
|                                 | Pt <sub>34</sub> Co <sub>66</sub> | 30                         | 76                  | 93                  | 35                                        |
|                                 | Pt <sub>21</sub> Co <sub>79</sub> | 35                         | 79                  | 95                  | 38                                        |
|                                 | Pt <sub>16</sub> Co <sub>84</sub> | 38                         | 78                  | 91                  | 41                                        |
|                                 | Pt/C                              | 50                         | 221                 | 299                 | 88                                        |
|                                 | Pt                                | 43                         | 97                  | 122                 | -                                         |

82 Table S4. EIS spectrum fitting data of Pt<sub>50</sub>Co<sub>50</sub>, Pt<sub>34</sub>Co<sub>66</sub>, Pt<sub>21</sub>Co<sub>79</sub>, Pt<sub>16</sub>Co<sub>84</sub>, and  
 83 commercial Pt/C in different electrolytes.

| Electrolytes                    | Catalysts                         | R <sub>s</sub> (Ω) | R <sub>ct</sub> (Ω) | W (Ω) |
|---------------------------------|-----------------------------------|--------------------|---------------------|-------|
| 1M KOH                          | Pt <sub>50</sub> Co <sub>50</sub> | 3.26               | 0.30                | 1.71  |
|                                 | Pt <sub>34</sub> Co <sub>66</sub> | 3.68               | 0.29                | 1.52  |
|                                 | Pt <sub>21</sub> Co <sub>79</sub> | 3.35               | 0.25                | 2.43  |
|                                 | Pt <sub>16</sub> Co <sub>84</sub> | 3.03               | 0.25                | 3.08  |
|                                 | Pt/C                              | 5.26               | 0.28                | 11.50 |
| 1M KOH +<br>3.5 wt%<br>NaCl     | Pt <sub>50</sub> Co <sub>50</sub> | 3.12               | 0.18                | 1.38  |
|                                 | Pt <sub>34</sub> Co <sub>66</sub> | 3.15               | 0.12                | 1.47  |
|                                 | Pt <sub>21</sub> Co <sub>79</sub> | 3.03               | 0.16                | 1.95  |
|                                 | Pt <sub>16</sub> Co <sub>84</sub> | 3.05               | 0.14                | 1.43  |
|                                 | Pt/C                              | 4.56               | 0.37                | 11.85 |
| 1M KOH +<br>natural<br>seawater | Pt <sub>50</sub> Co <sub>50</sub> | 2.91               | 0.30                | 1.91  |
|                                 | Pt <sub>34</sub> Co <sub>66</sub> | 2.97               | 0.25                | 2.15  |
|                                 | Pt <sub>21</sub> Co <sub>79</sub> | 3.10               | 0.39                | 2.51  |
|                                 | Pt <sub>16</sub> Co <sub>84</sub> | 2.88               | 0.21                | 2.20  |
|                                 | Pt/C                              | 5.64               | 0.21                | 8.09  |

84 Table S5. C<sub>dl</sub> values, ECSA, and RF of Pt<sub>50</sub>Co<sub>50</sub>, Pt<sub>34</sub>Co<sub>66</sub>, Pt<sub>21</sub>Co<sub>79</sub>, Pt<sub>16</sub>Co<sub>84</sub>, and  
 85 commercial Pt/C obtained in 1 M KOH + 3.5 wt% NaCl.

| Catalysts                         | C <sub>dl</sub> (mF) | ECSA (cm <sup>2</sup> ) | RF     |
|-----------------------------------|----------------------|-------------------------|--------|
| Pt <sub>50</sub> Co <sub>50</sub> | 1.89                 | 47.13                   | 188.50 |
| Pt <sub>34</sub> Co <sub>66</sub> | 3.48                 | 86.94                   | 347.75 |
| Pt <sub>21</sub> Co <sub>79</sub> | 2.53                 | 63.19                   | 252.75 |
| Pt <sub>16</sub> Co <sub>84</sub> | 2.45                 | 61.19                   | 244.75 |
| Pt/C                              | 1.88                 | 46.88                   | 187.50 |



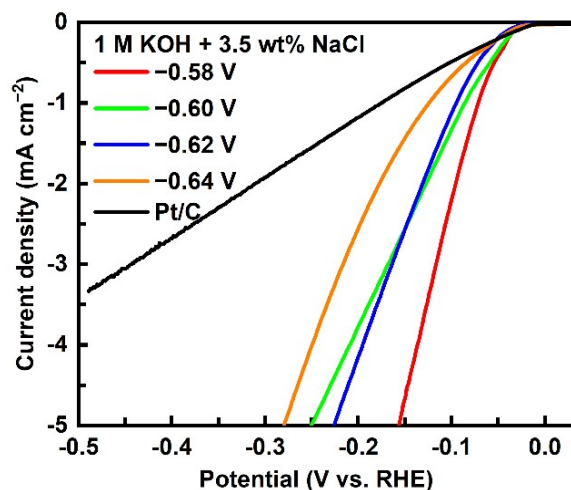

86

87

Fig. S6. LSV curves normalized by ECSA.

88 Table S6. The composition of Pt<sub>34</sub>Co<sub>66</sub> (the as-prepared state and after the long-term  
 89 aging stability test in 1M KOH + natural seawater) and electrolyte (1M KOH +  
 90 natural seawater after the long-term aging stability test) determined by ICP-MS.

| Sample                                                     | Element (at.%) |       |       |       |
|------------------------------------------------------------|----------------|-------|-------|-------|
|                                                            | Pt             | Co    | Mg    | Ca    |
| Pt <sub>34</sub> Co <sub>66</sub> at the as-prepared state | 33.85          | 66.15 | -     | -     |
| Pt <sub>34</sub> Co <sub>66</sub> after long aging test    | 54.49          | 32.87 | 2.88  | 9.76  |
| electrolyte                                                | 0.01           | 0.01  | 46.14 | 53.84 |

### 91 Chlorine corrosion mechanism of seawater HER

92 As for the electrocatalytic process taking place in alkaline simulated seawater (1  
 93 M KOH + 3.5 wt% NaCl) and alkaline natural seawater (1 M KOH + natural seawater),  
 94 the aggressive chloride anions can form metal chlorides/hydroxides to corrode catalysts  
 95 and substrates through the following mechanisms [S6, S7]:

96 Adsorption of Cl<sup>-</sup> by surface polarization:

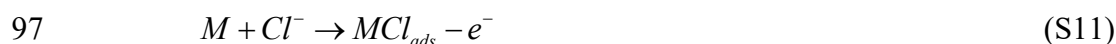

98 Dissolution by further coordination:

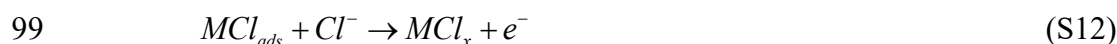

100 Conversion from chloride to hydroxide:

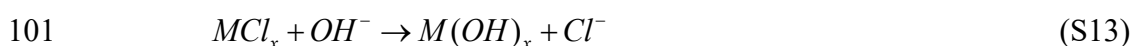

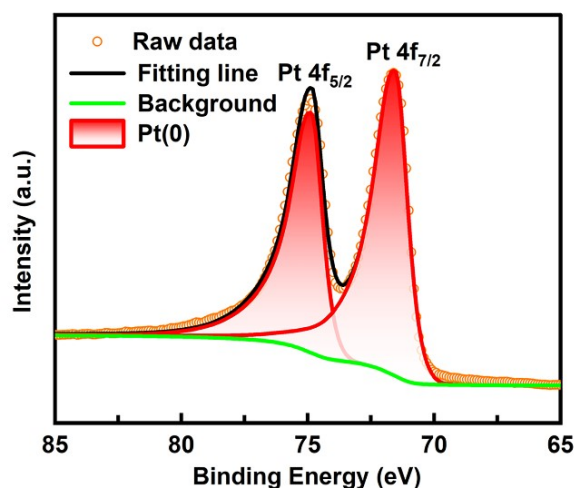

102

103

Fig. S7. High resolution XPS spectra of Pt 4f peaks of Pt deposited.

#### 104 **References**

105 S1. Y. Chen, J. Zhang, J. Sort, E. Pellicer and R. Guan, International Journal of  
 106 Hydrogen Energy, 2024, 59, 625-634.

107 S2. I. H. Cardona, E. Ortega, L. V. Gómez and V. P. Herranz, International Journal of  
 108 Hydrogen Energy, 2012, 37, 2147-2156.

109 S3. S. Anwar, F. Khan, Y. Zhang and A. Djire, International Journal of Hydrogen  
 110 Energy, 2021, 46, 32284-32317.

111 S4. Z. Zhou, Z. Pei, L. Wei, S. Zhao, X. Jian and Y. Chen, Energy & Environmental  
 112 Science, 2020, 13, 3185-3206.

113 S5. E. Cossar, M. S. E. Houache, Z. Zhang and E. A. Baranova, Journal of  
 114 Electroanalytical Chemistry, 2020, 870.

115 S6. X. Q. Zhang, Y. X. Xiao, G. Tian, X. Yang, Y. Dong, F. Zhang and X. Y. Yang,  
 116 Chemistry, 2023, 29, e202202811.

117 S7. Y. Kuang, M. J. Kenney, Y. T. Meng, W. H. Hung, Y. J. Liu, J. E. Huang, R.  
 118 Prasanna, P. S. Li, Y. P. Li, L. Wang, M. C. Lin, M. D. McGehee, X. M. Sun and H. J.  
 119 Dai, Proceedings of the National Academy of Sciences of the United States of America,  
 120 2019, 116, 6624-6629.
